# Supplementary material
Source: publisher figshare collection journal article supplement (https://aacr.figshare.com/ndownloader/files/39853866)
Supplement: Supplementary file 1 [file 39853866]

| **Supplementary Table S1: Immunoreactive Score (IRS) according to Remmele & Stegner.** | | |
| --- | --- | --- |
| **A (% of positive cells)** | **B (Staining intensity)** | **A x B= IRS** |
| 4 = >80% positive cells |  |  |
| 3 = 51-80% of positive cells | 3 = strong colour reaction | 9-12 = strong |
| 2 = 10-50% of positive cells | 2 = moderate colour reaction | 6-8 = moderate |
| 1 = <10% of positive cells | 1 = weak colour reaction | 3-4 = weak |
| 0 = no positive cells | 0 = no colour reaction | 0-2 = negative |
